# Supplementary material for: Selective leaching of lead from lead smelter residues using EDTA
Source: Royal Society of Chemistry journal article supplement (doi:10.1039/d0ra08517k), 2020-01-01
Supplement: d0ra08517k1.pdf [file d0ra08517k1.pdf]

## Selective leaching of lead from lead smelter residues using EDTA

Thupten Palden<sup>†‡</sup>, Lieven Machiels<sup>†‡</sup>, Bieke Onghena<sup>†‡</sup>, Mercedes Regadío<sup>†</sup>, Koen Binnemans<sup>†\*</sup>

<sup>†</sup> KU Leuven, Department of Chemistry, Celestijnenlaan 200F, P.O. box 2404, B-3001 Leuven, Belgium.

<sup>‡</sup> SIM vzw, Technologiepark 935, B-9052 Zwijnaarde, Belgium.

\*Corresponding author:

Email: Koen.Binnemans@kuleuven.be

**Electronic Supplementary Information (ESI)**

# Electronic Supplementary Information

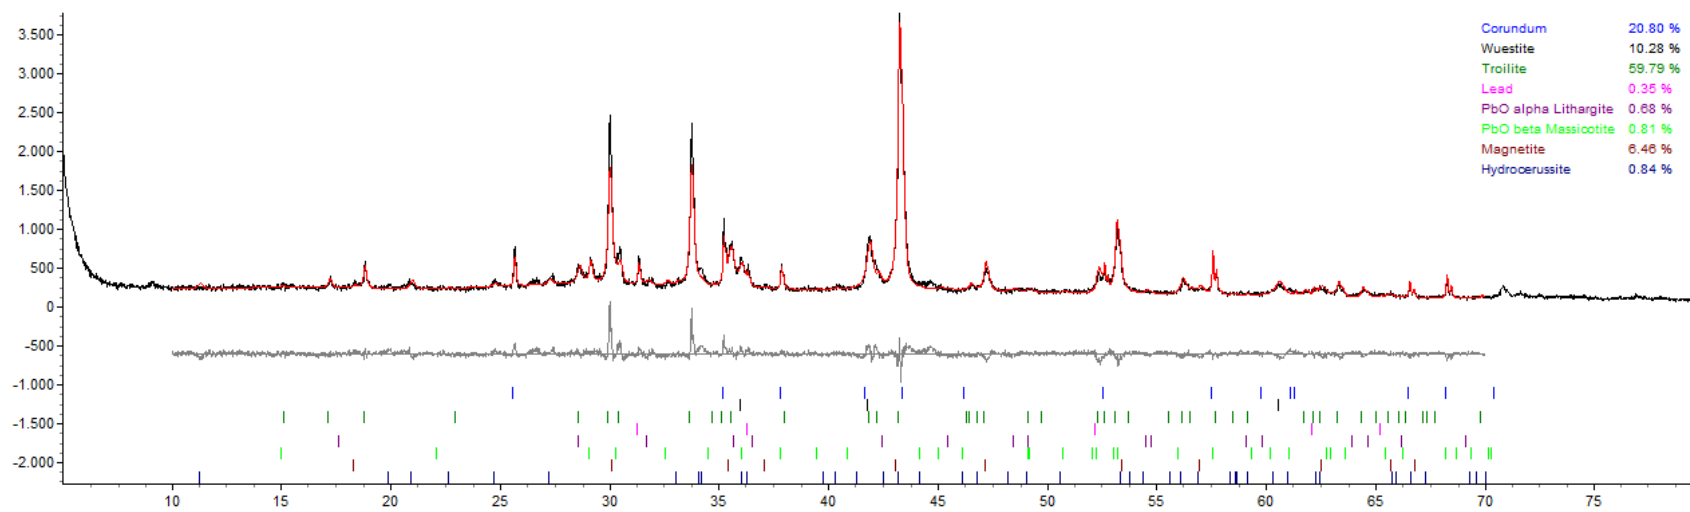

Figure S1: XRD pattern of the matte residue before leaching.

## Electronic Supplementary Information

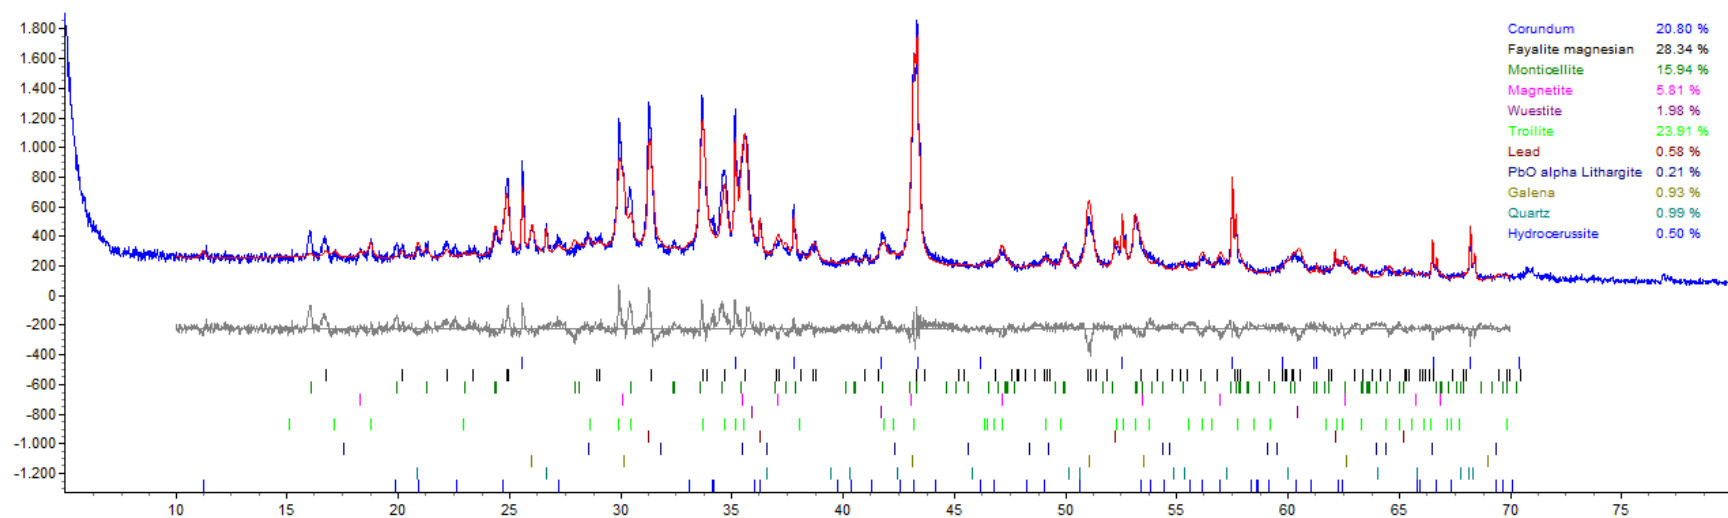

Figure S2: XRD pattern of the slag residue before leaching.

slag PB precipitate (Coupled TwoTheta/Theta)

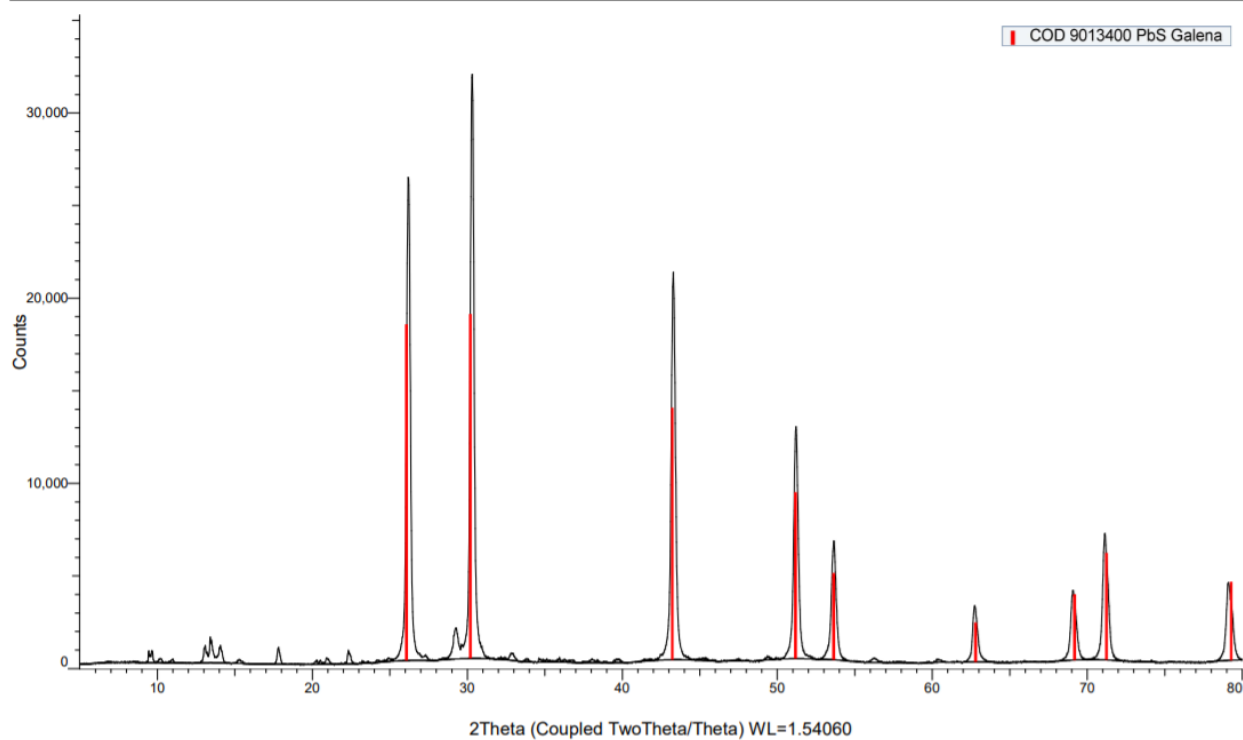

Figure S3: XRD pattern of the lead precipitate after adding ammonium sulfide to the PLS.

Electronic Supplementary Information

Table S1: pH change during recovery of EDTA from the PLS.

| Residue | Fraction                   | pH    |
|---------|----------------------------|-------|
|         | fresh EDTA                 | 8     |
| Matte   | Fresh PLS                  | 12.32 |
|         | 1 <sup>st</sup> recovered  | 11.73 |
|         | 1 <sup>st</sup> cycled PLS | 13.42 |
|         | 2 <sup>nd</sup> recovered  | 11.19 |
|         | 2 <sup>nd</sup> cycled PLS | 11.11 |
| Slag    | fresh PLS                  | 10.11 |
|         | 1 <sup>st</sup> recovered  | 11.52 |
|         | 1 <sup>st</sup> cycled PLS | 13.11 |
|         | 2 <sup>nd</sup> recovered  | 11.12 |
|         | 2 <sup>nd</sup> cycled PLS | 10.56 |
